# Supplementary material for: Cholesterol trafficking to the ER leads to the activation of CaMKII/JNK/NLRP3 and promotes atherosclerosis
Source: PubMed Central journal article supplement (PMC11031842; doi:10.1016/j.jlr.2024.100534), 2024-03-22

# Supplementary Figure 1

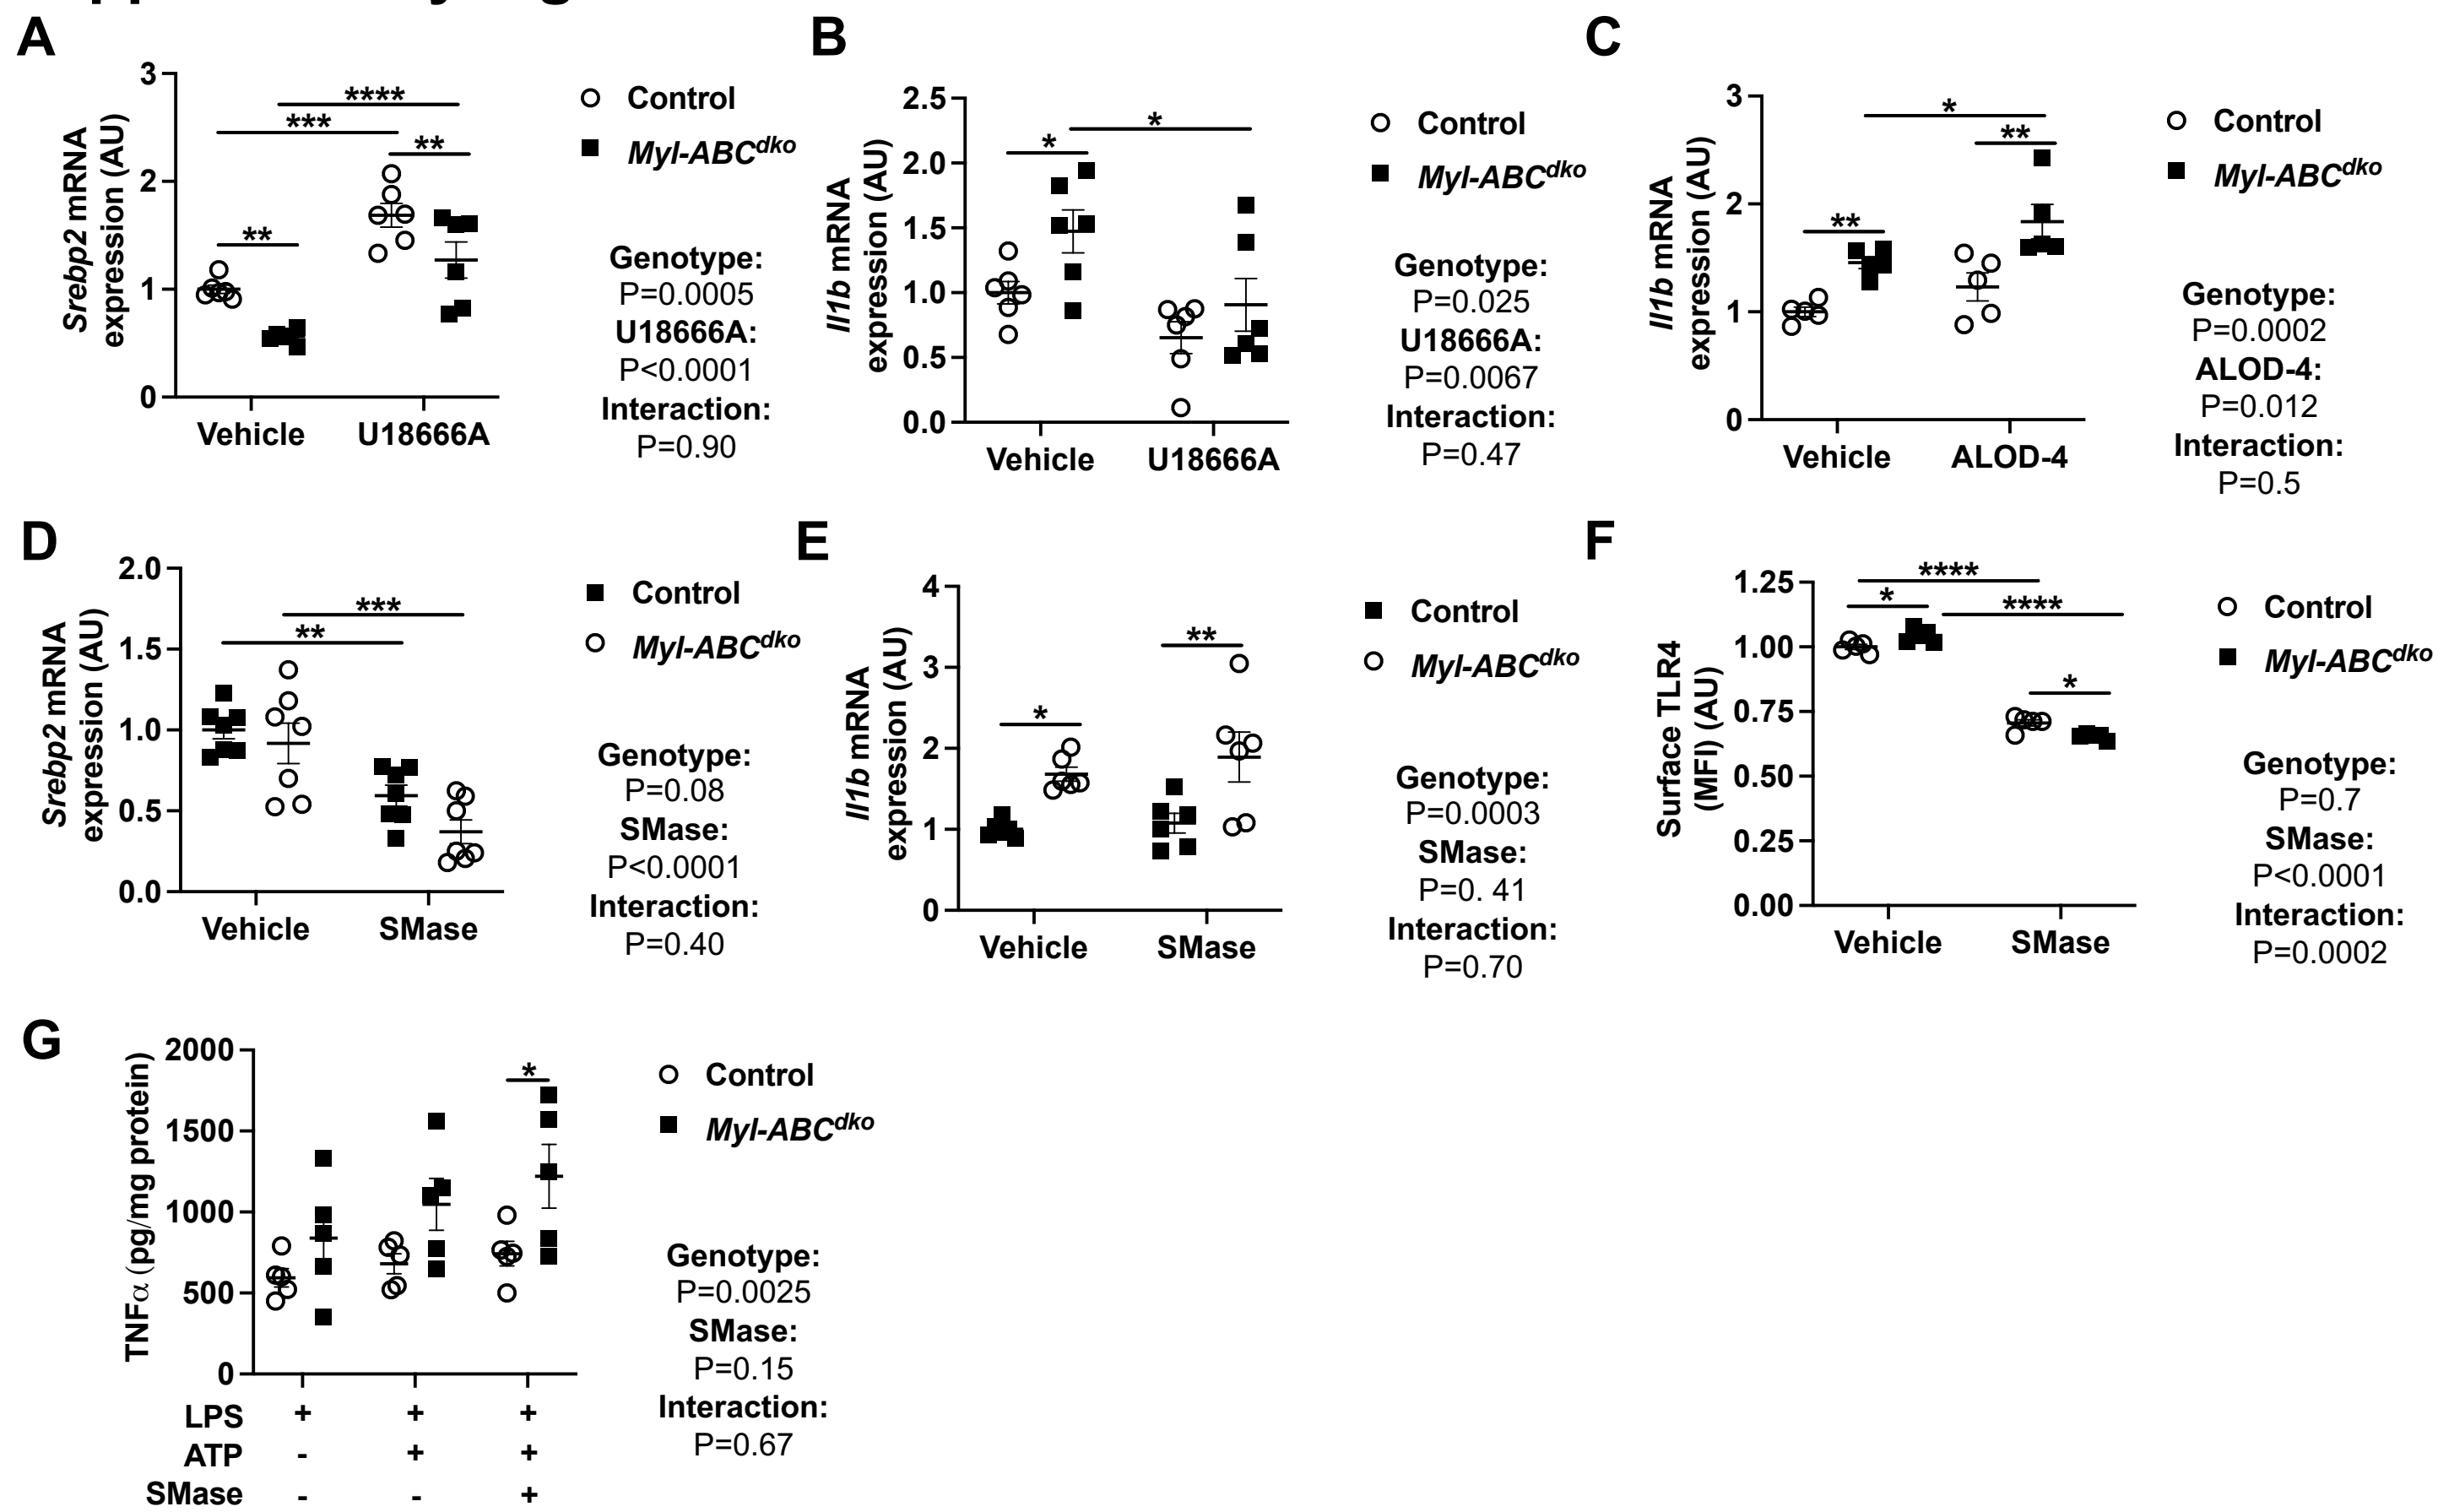

# Supplementary Figure 2

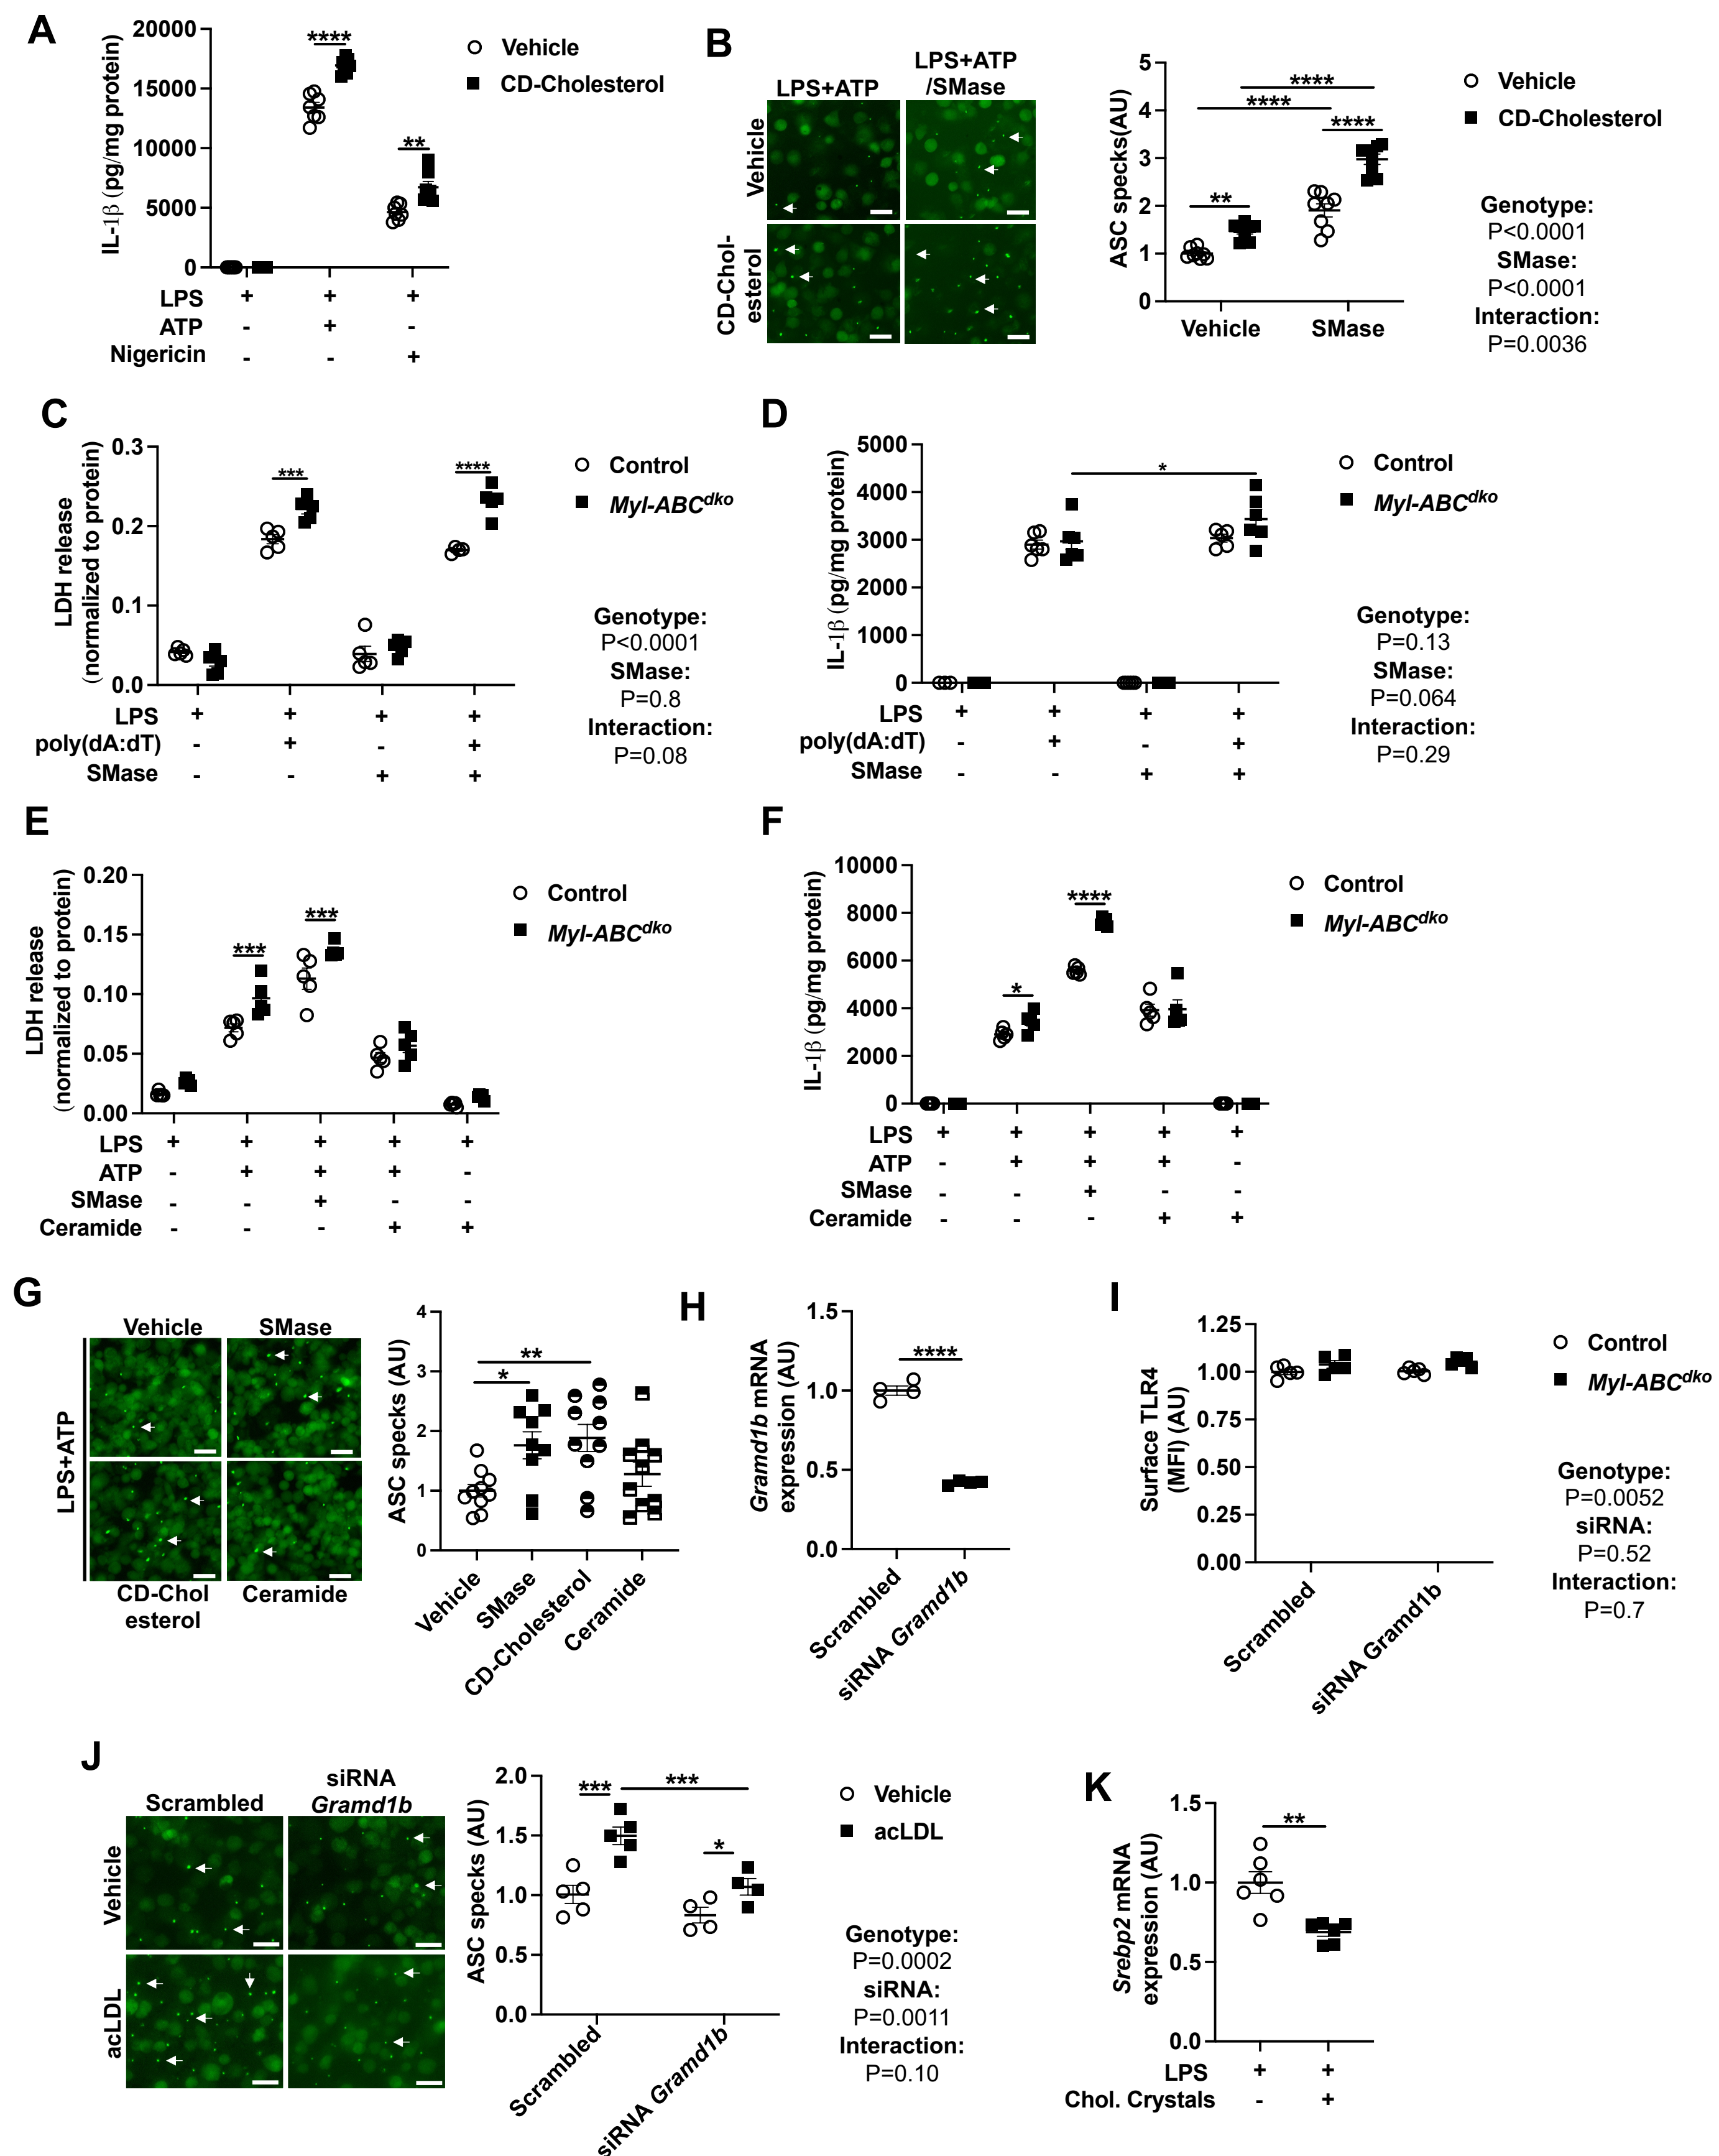

# Supplementary Figure 3

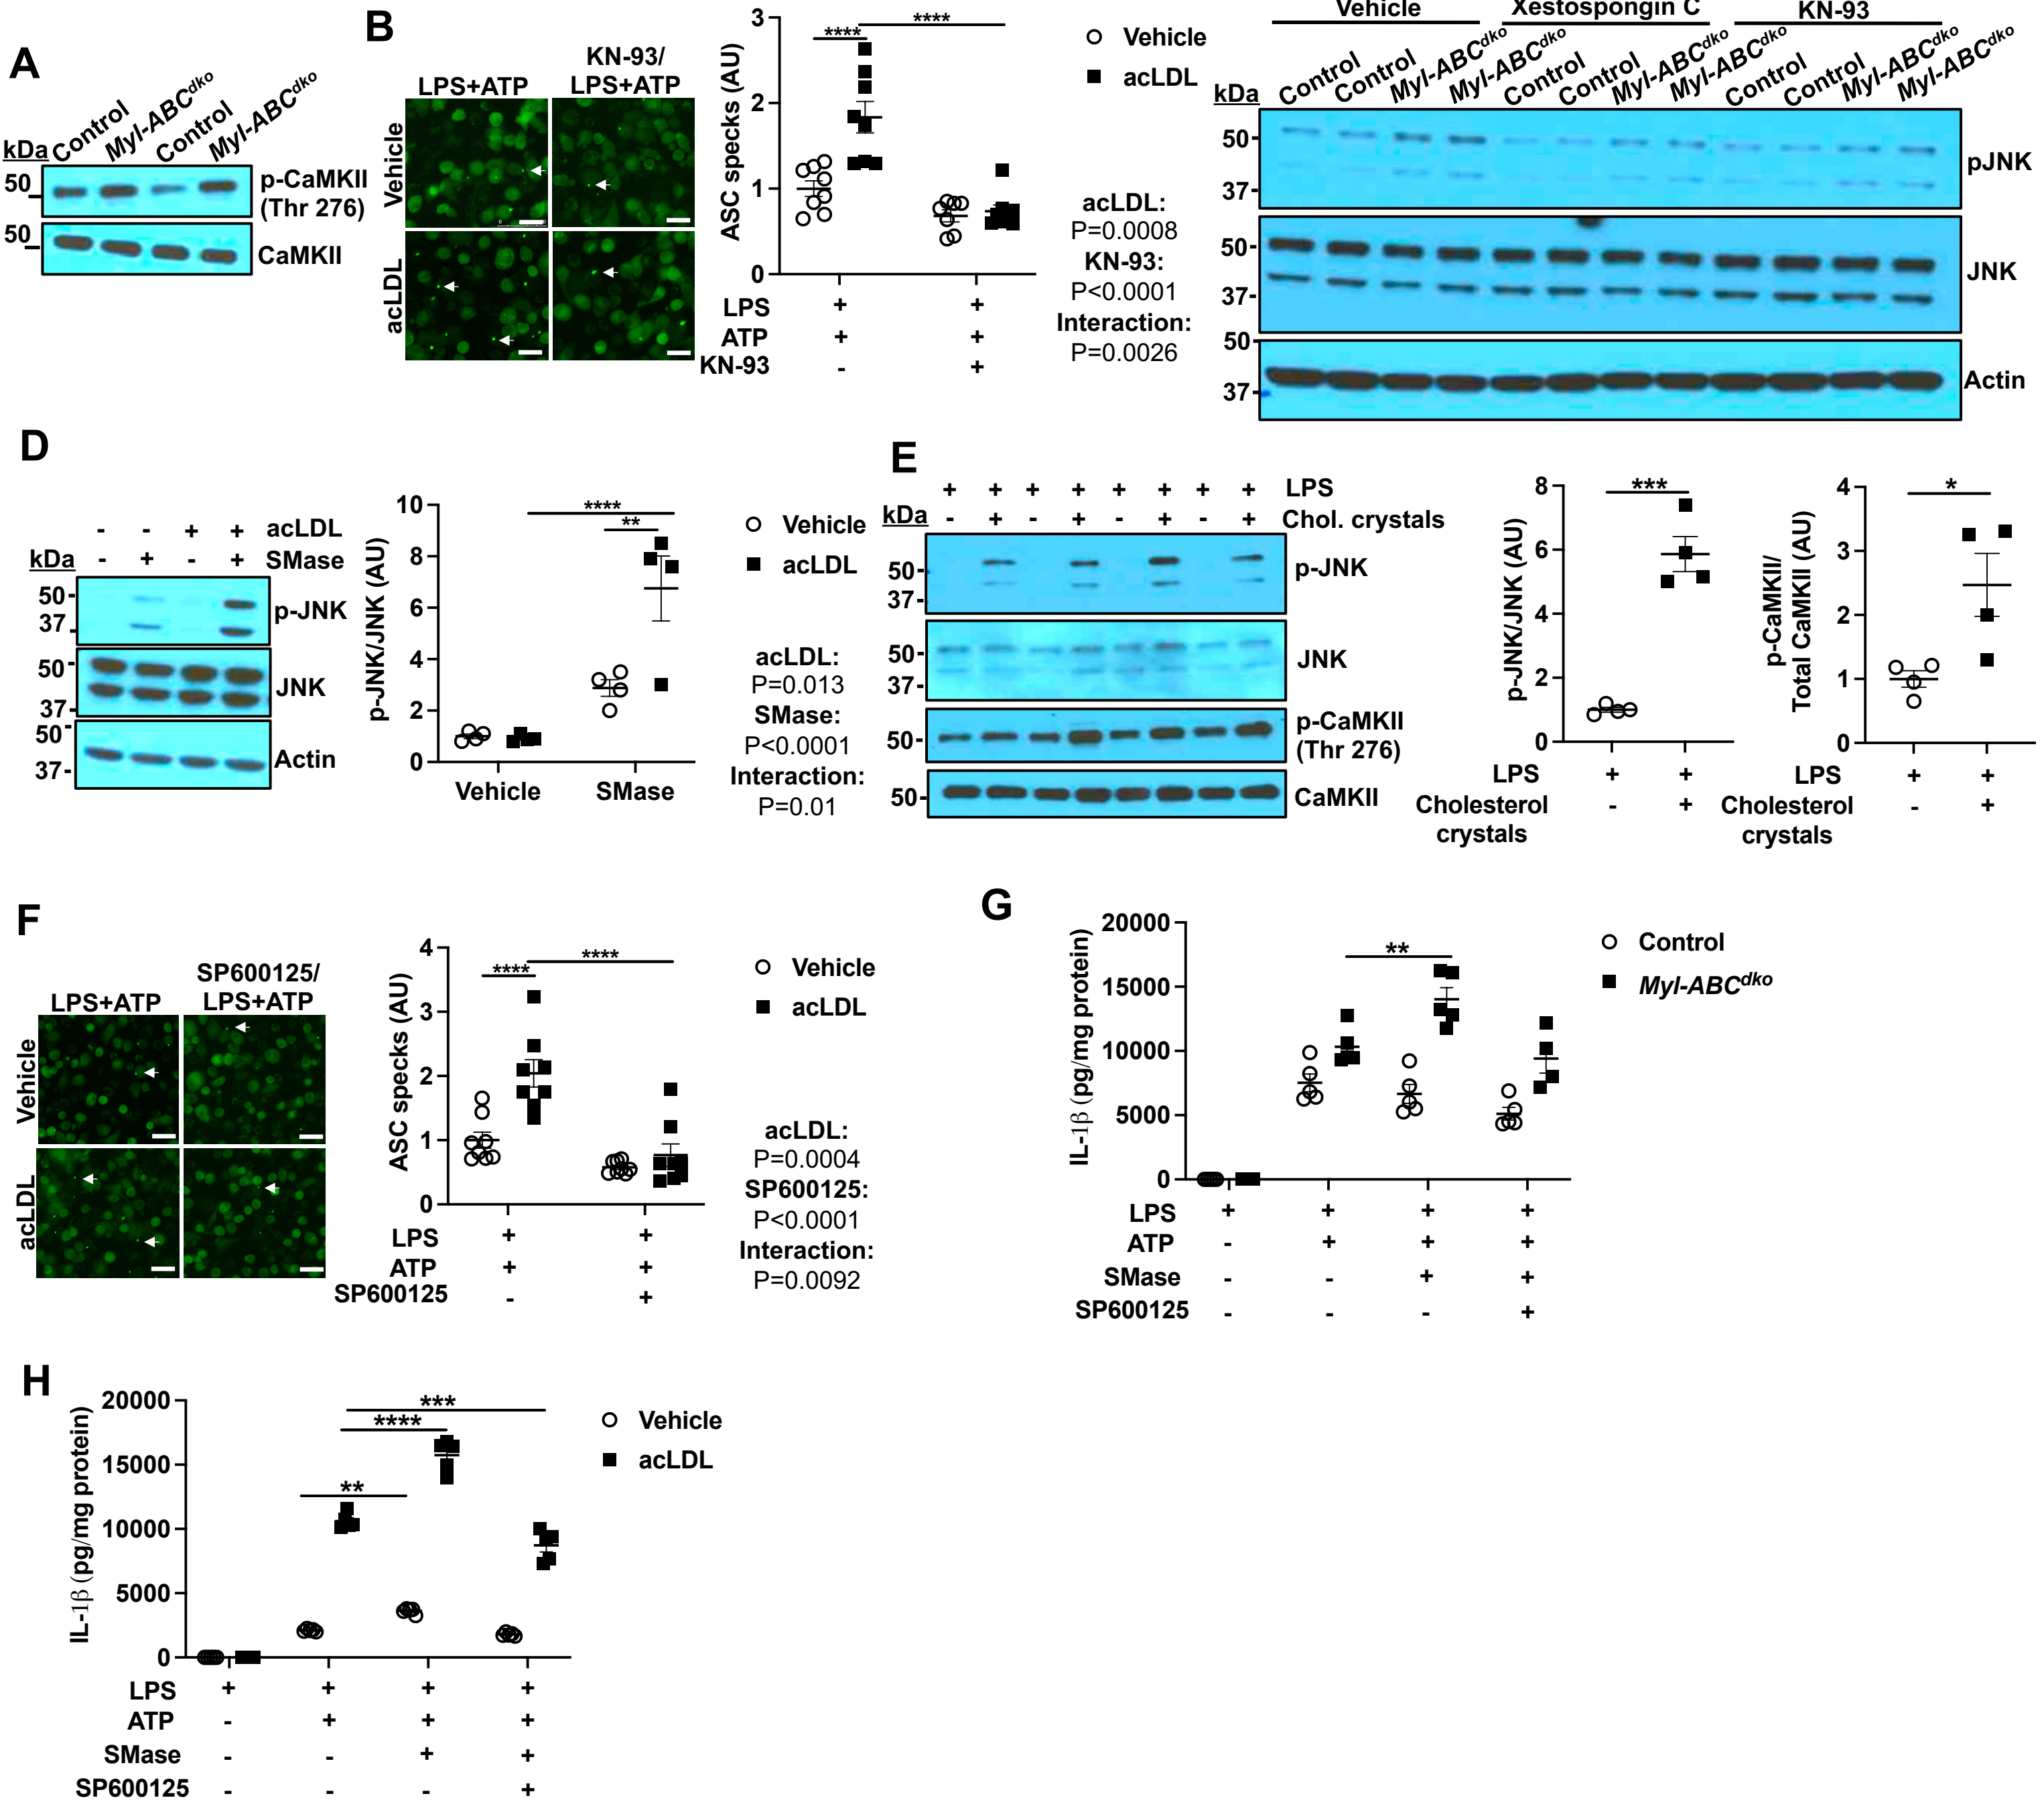

# Supplementary Figure 4

## A

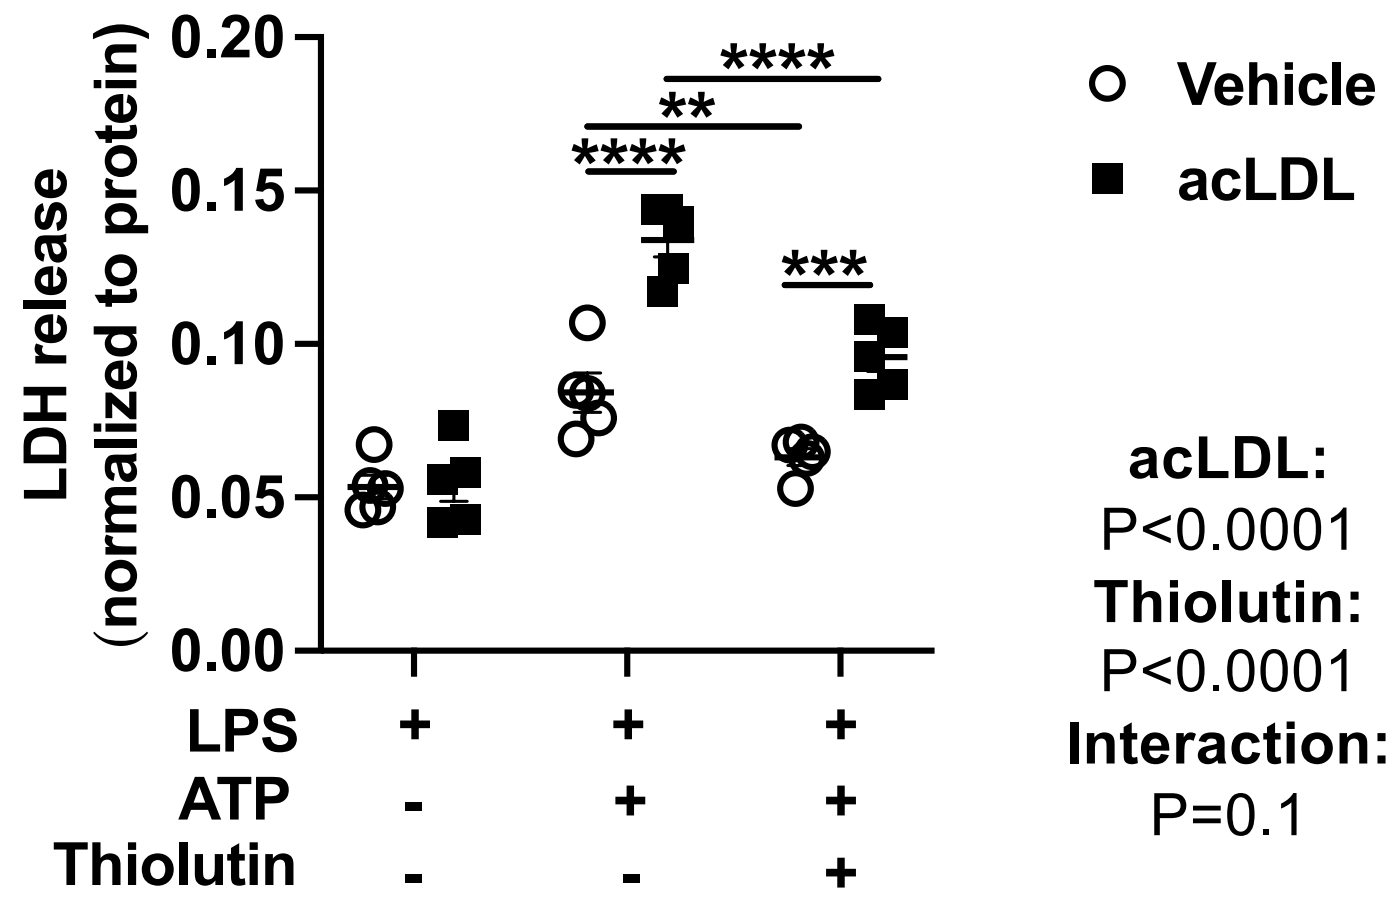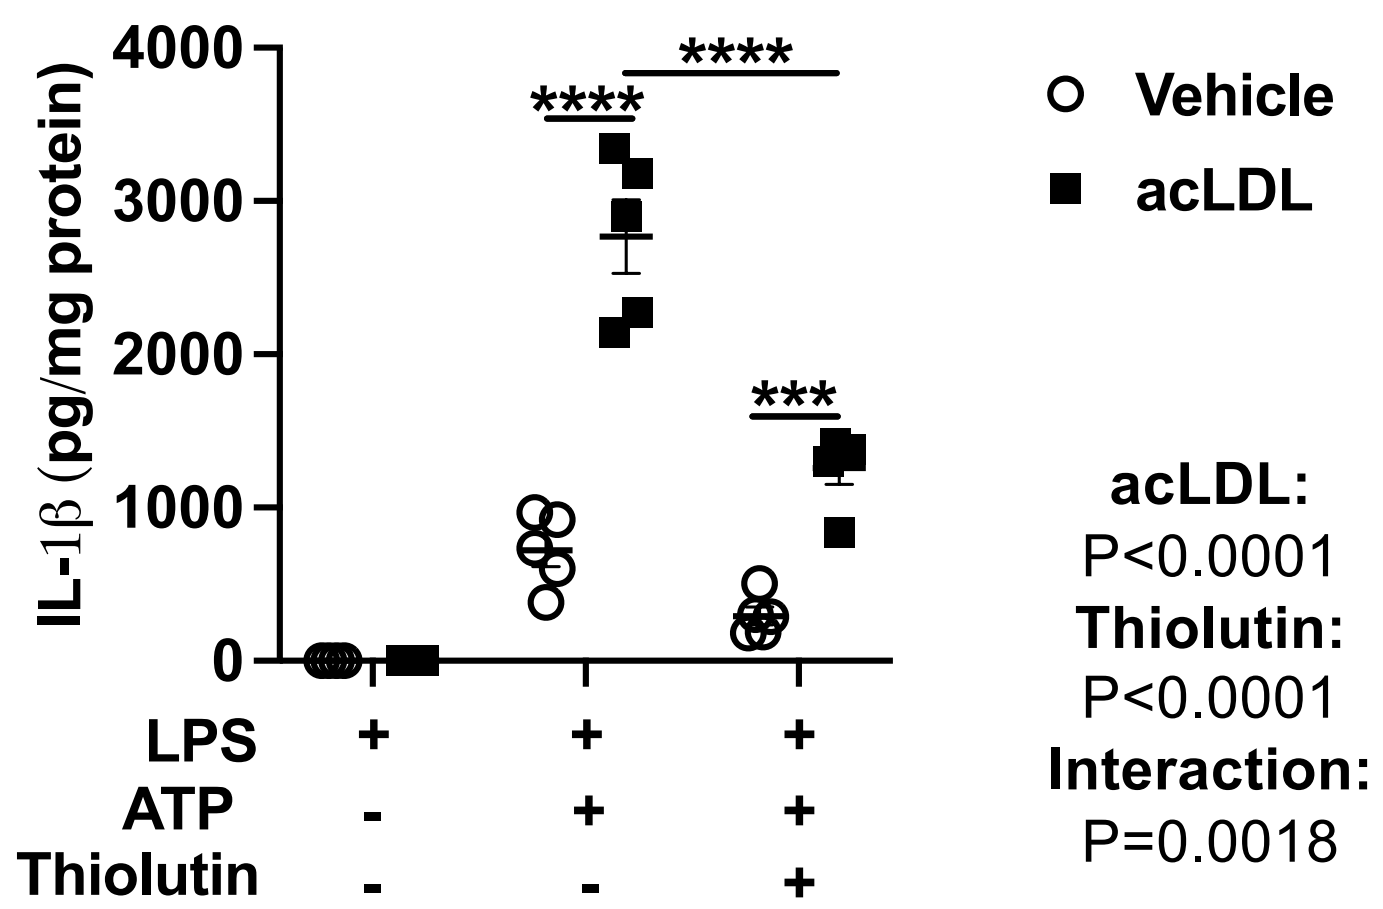

## B

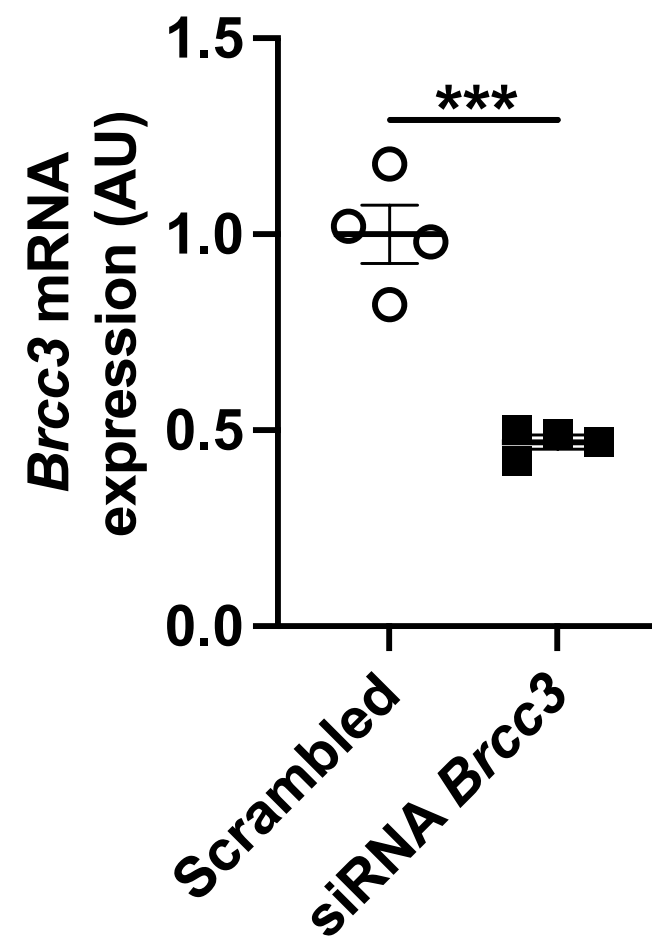



# Supplementary Figure 5

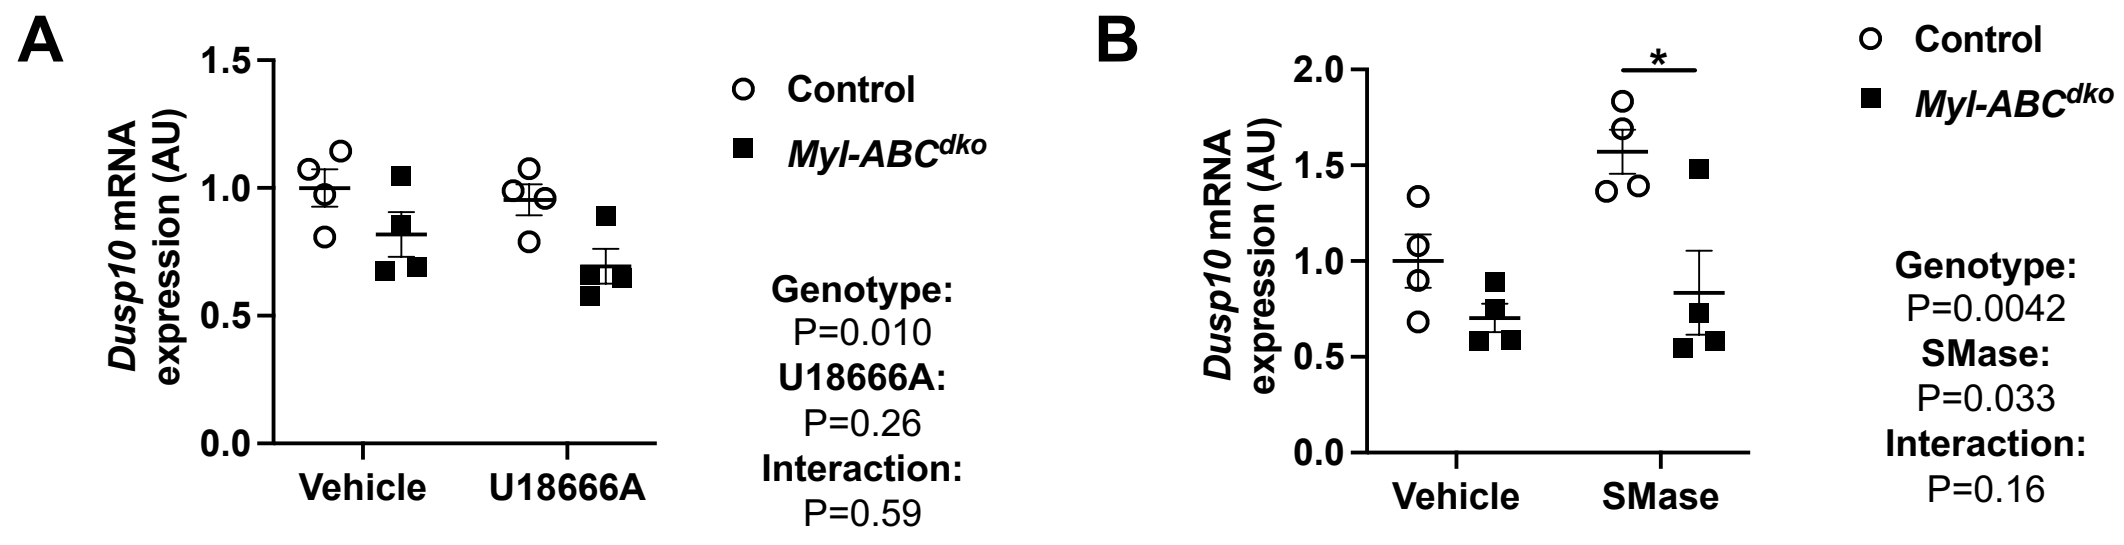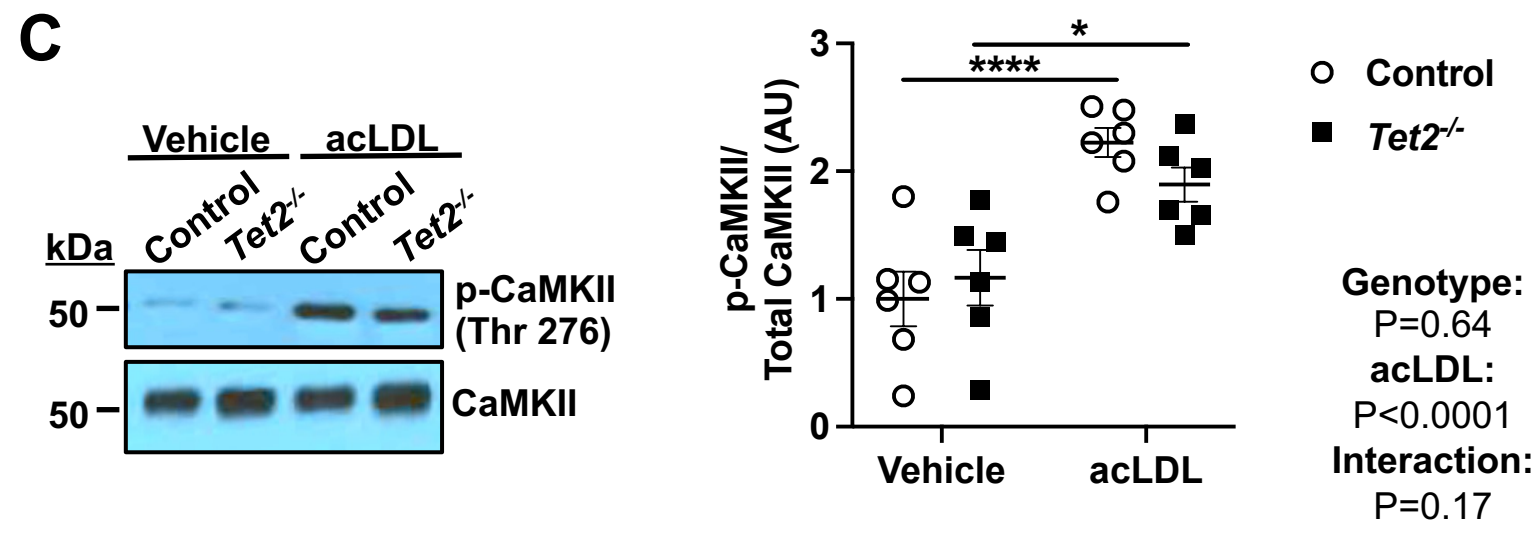

# Supplementary Figure 6

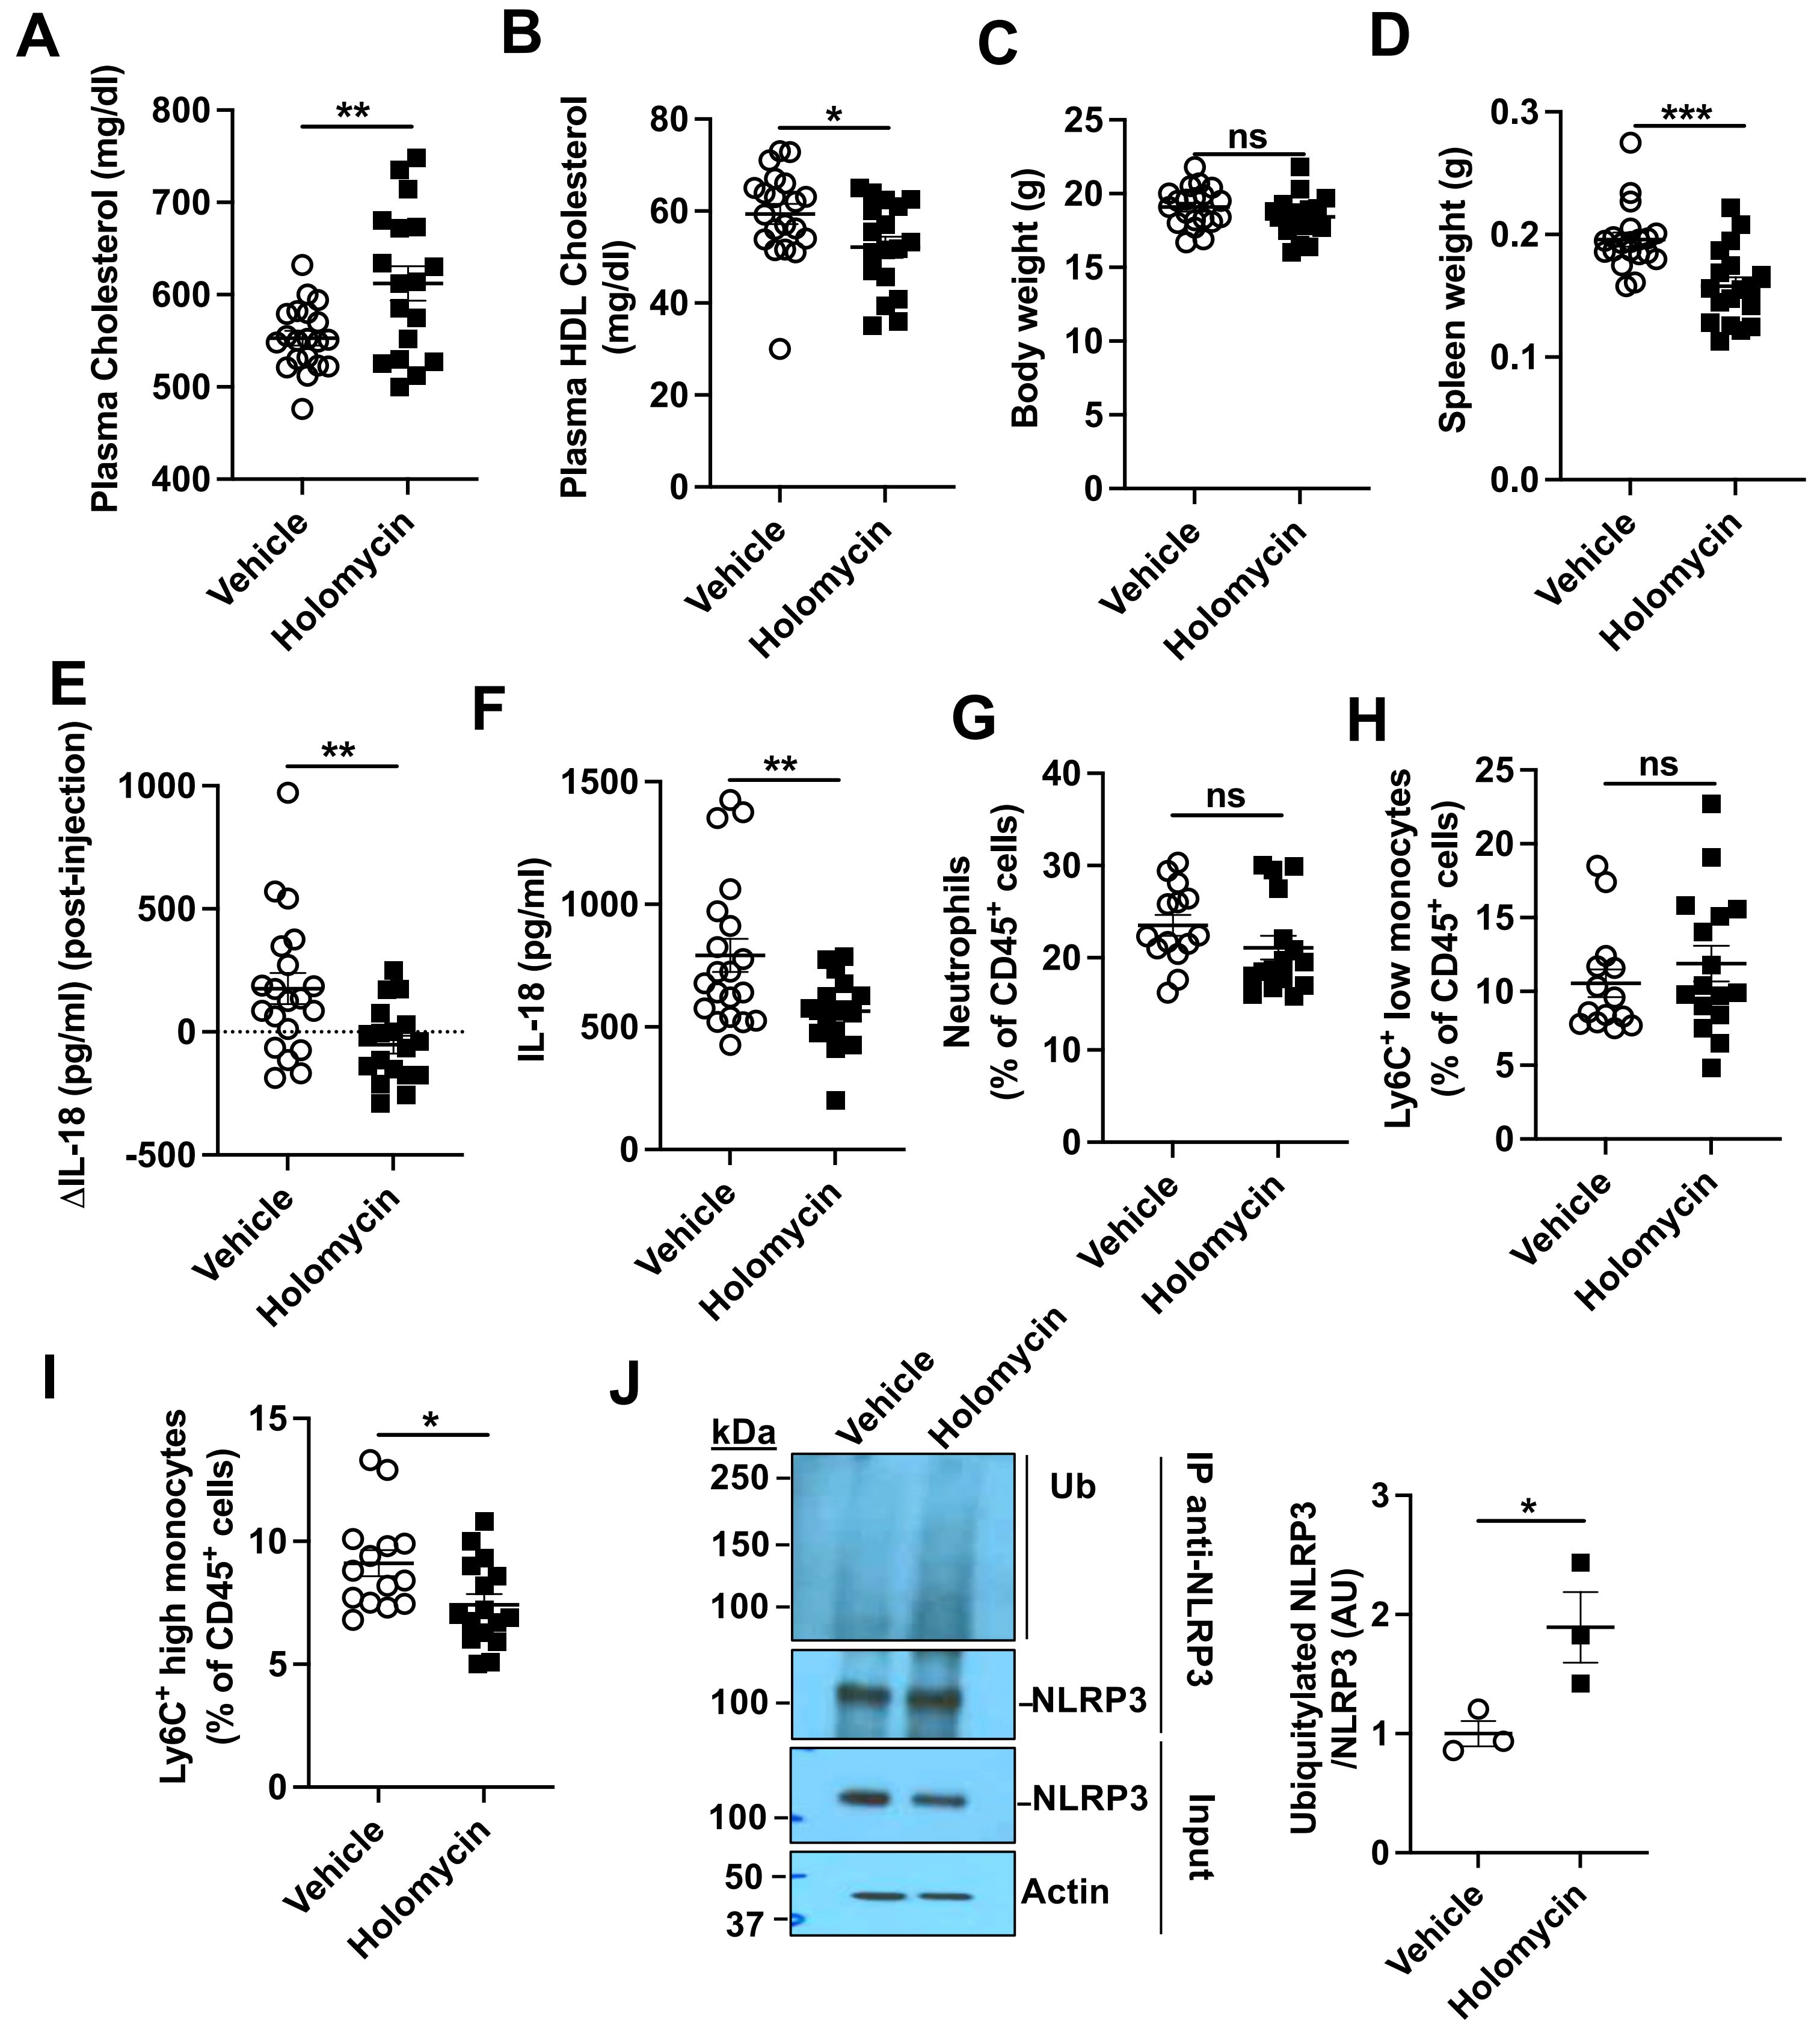

# Supplementary Figure 7

**A**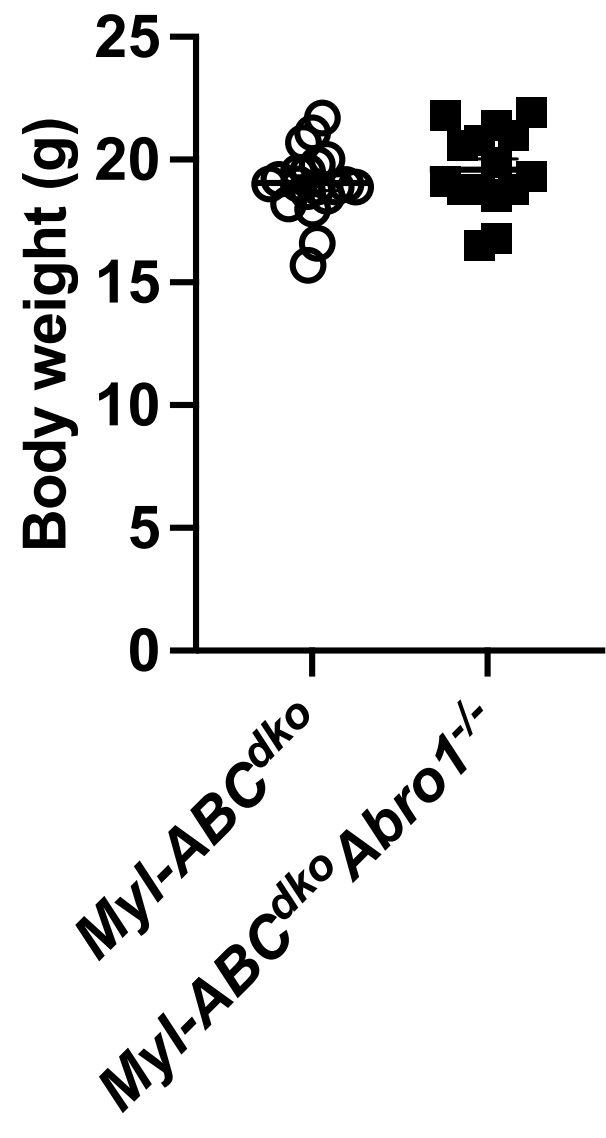**B**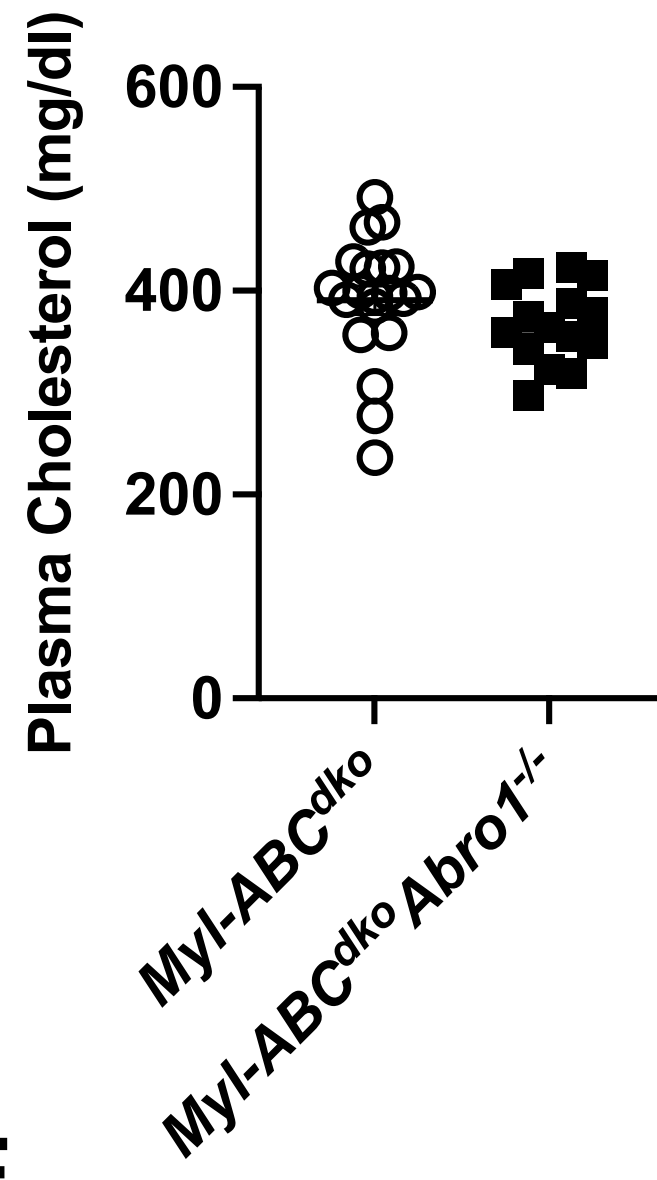**C**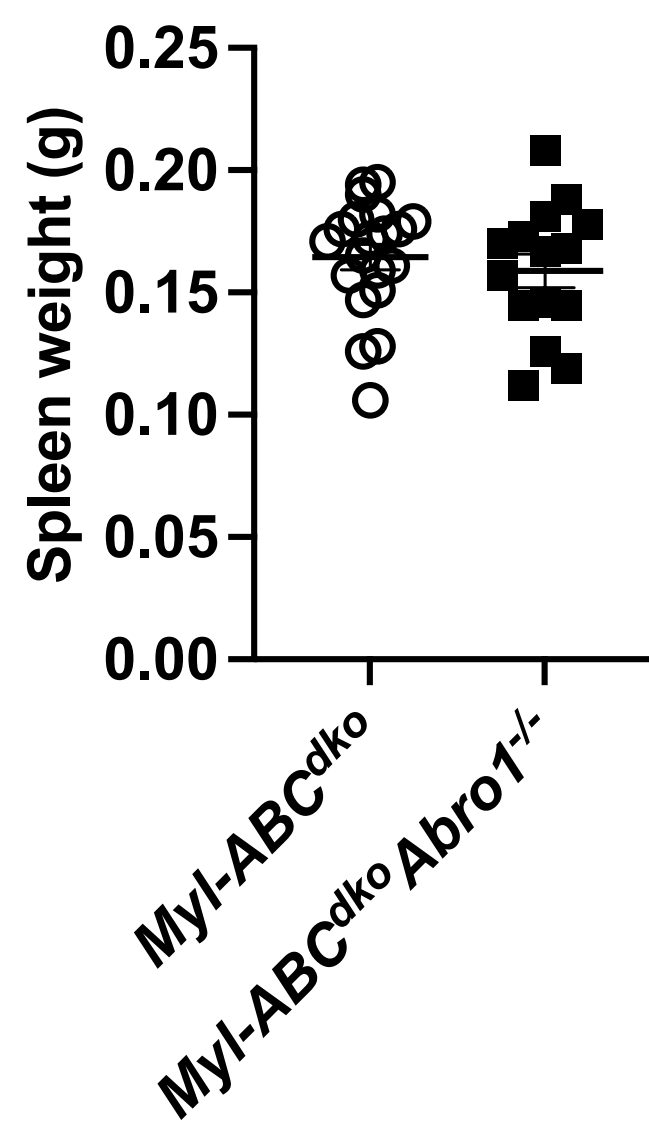**D**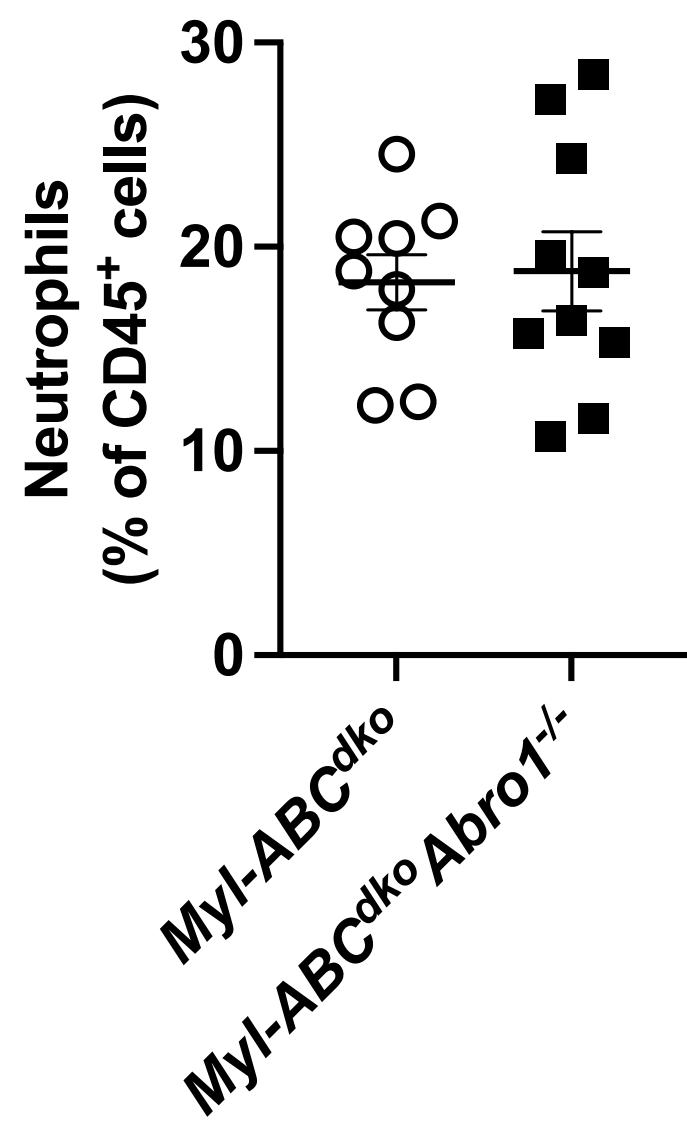**E**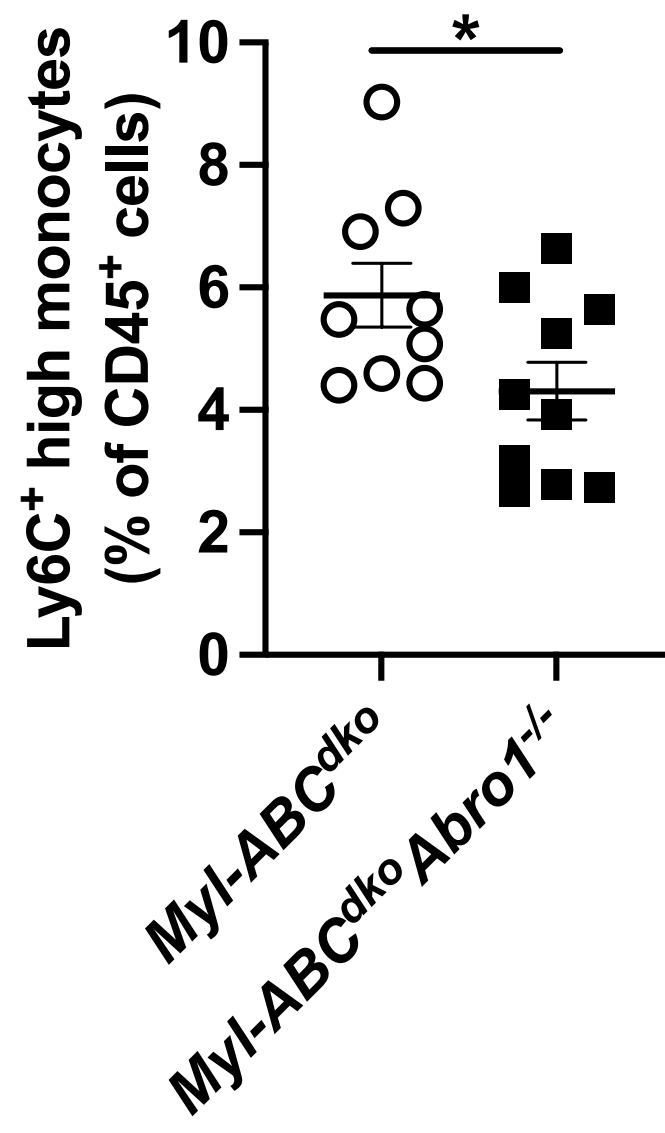**F**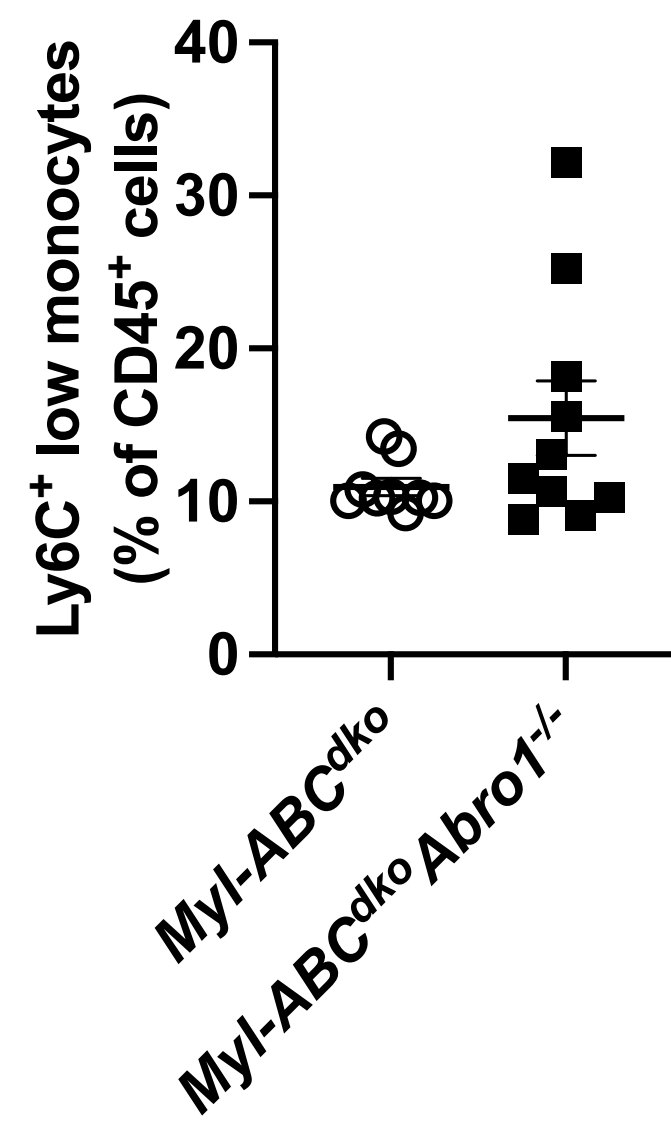

Supplement: mmc1.pdf [file mmc1.pdf]
